# Supplementary material for: An immunogen containing four tandem 10E8 epitope repeats with exposed key residues induces antibodies that neutralize HIV-1 and activates an ADCC reporter gene
Source: PubMed Central journal article supplement (PMC4932654; doi:10.1038/emi.2016.86), 2016-06-22
Supplement: emi201686x1.pdf [file emi201686x1.pdf]

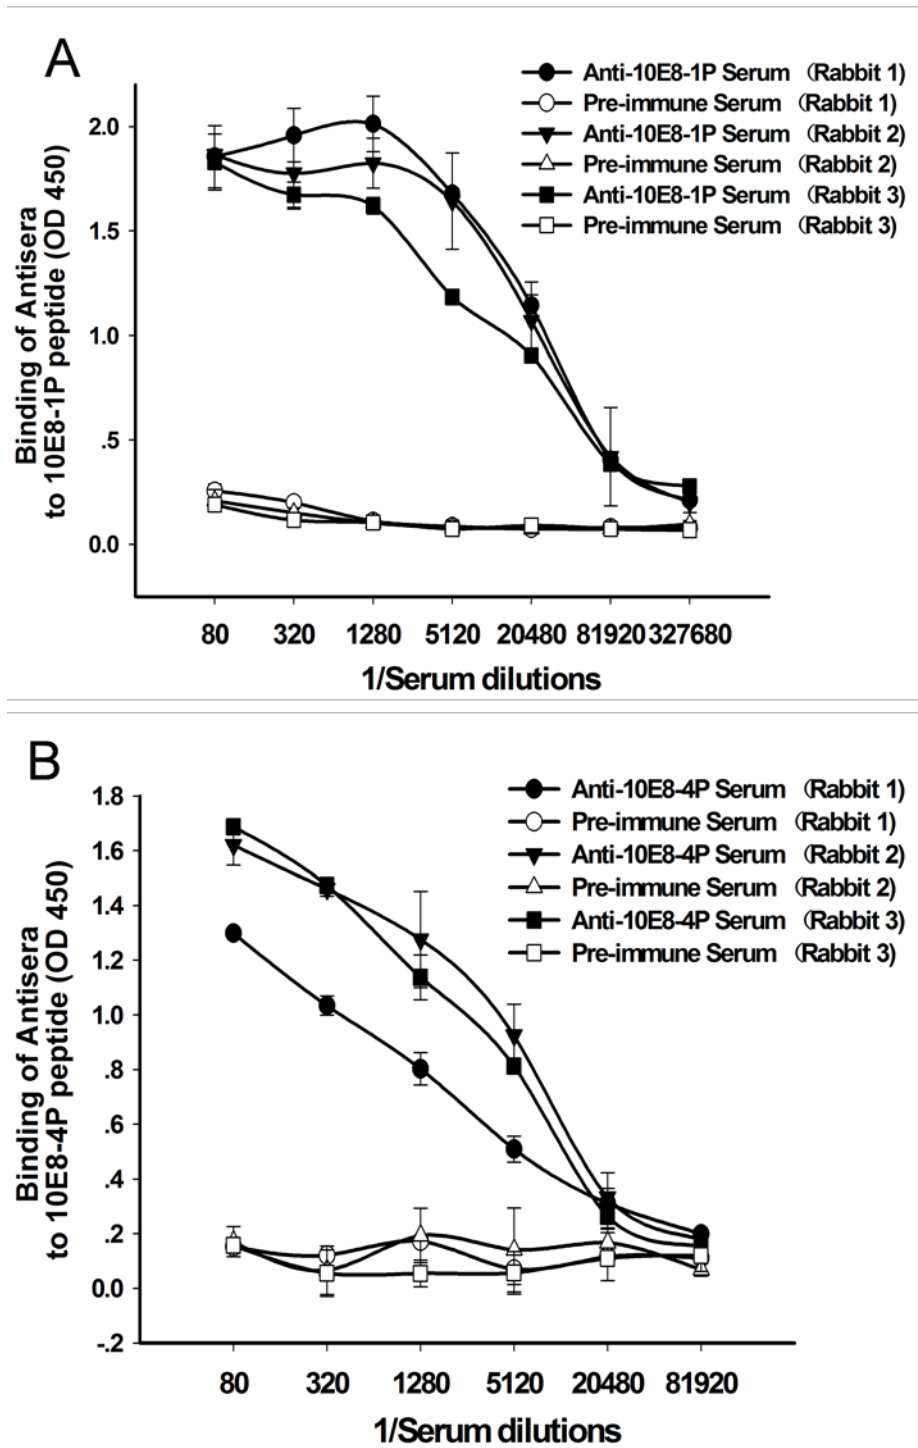

**Figure S1.** The titer of peptide-binding antibodies in sera of rabbits two weeks after the last immunization with 10E8-1P (A) and 10E8-4P (B). The samples were tested in triplicate and the data are shown in mean  $\pm$  SD.
